# Supplementary material
Source: publisher figshare collection journal article supplement (https://f1000.figshare.com/ndownloader/files/1262655)
Supplement: Supplementary file 1 [file 1262655]

Treatment	Almond block	Row location	Total mummy nuts	Eaten by birds	Percent eaten	Treatment	Almond block	Row location	Total mummy nuts	Non-bird nut loss	Percent loss
Open trees	1	Edge	54	40	74.07407407	Netted trees	1	Edge	44	1	2.272727273
Open trees	1	Edge	57	41	71.92982456	Netted trees	1	Edge	41	2	4.87804878
Open trees	1	Edge	41	29	70.73170732	Netted trees	1	Edge	46	3	6.52173913
Open trees	1	Edge	18	14	77.77777778	Netted trees	1	Edge	18	0	0
Open trees	1	Edge	30	17	56.66666667	Netted trees	1	Edge	32	0	0
Open trees	1	Edge	19	8	42.10526316	Netted trees	1	Edge	19	2	10.52631579
Open trees	1	Edge	21	8	38.0952381	Netted trees	1	Edge	21	0	0
Open trees	1	Edge	31	19	61.29032258	Netted trees	1	Edge	23	4	17.39130435
Open trees	1	Edge	67	44	65.67164179	Netted trees	1	Edge	44	2	4.545454545
Open trees	1	Edge	91	71	78.02197802	Netted trees	1	Edge	46	1	2.173913043
Open trees	1	Edge	29	8	27.5862069	Netted trees	1	Edge	50	3	6
Open trees	1	Edge	22	8	36.36363636	Netted trees	1	Edge	16	4	25
Open trees	1	Edge	17	2	11.76470588	Netted trees	1	Edge	50	6	12
Open trees	1	Edge	41	29	70.73170732	Netted trees	1	Edge	15	1	6.666666667
Open trees	1	Edge	17	2	11.76470588	Netted trees	1	Edge	38	5	13.15789474
Open trees	1	Interior	23	10	43.47826087	Netted trees	1	Interior	38	1	2.631578947
Open trees	1	Interior	29	5	17.24137931	Netted trees	1	Interior	37	0	0
Open trees	1	Interior	17	2	11.76470588	Netted trees	1	Interior	20	0	0
Open trees	1	Interior	13	2	15.38461538	Netted trees	1	Interior	39	2	5.128205128
Open trees	1	Interior	28	5	17.85714286	Netted trees	1	Interior	47	1	2.127659574
Open trees	1	Interior	87	70	80.45977011	Netted trees	1	Interior	36	0	0
Open trees	1	Interior	46	12	26.08695652	Netted trees	1	Interior	12	0	0
Open trees	1	Interior	23	1	4.347826087	Netted trees	1	Interior	22	1	4.545454545
Open trees	1	Interior	25	3	12	Netted trees	1	Interior	40	5	12.5
Open trees	1	Interior	18	2	11.11111111	Netted trees	1	Interior	42	5	11.9047619
Open trees	1	Interior	11	2	18.18181818	Netted trees	1	Interior	37	0	0
Open trees	1	Interior	14	1	7.142857143	Netted trees	1	Interior	19	1	5.263157895
Open trees	1	Interior	82	8	9.756097561	Netted trees	1	Interior	17	2	11.76470588
Open trees	1	Interior	35	9	25.71428571	Netted trees	1	Interior	10	0	0
Open trees	1	Interior	62	17	27.41935484	Netted trees	1	Interior	49	4	8.163265306
Open trees	2	Edge	34	21	61.76470588	Netted trees	2	Edge	47	2	4.255319149
Open trees	2	Edge	24	10	41.66666667	Netted trees	2	Edge	12	0	0
Open trees	2	Edge	42	34	80.95238095	Netted trees	2	Edge	34	7	20.58823529
Open trees	2	Edge	15	7	46.66666667	Netted trees	2	Edge	36	4	11.11111111
Open trees	2	Edge	19	4	21.05263158	Netted trees	2	Edge	20	1	5
Open trees	2	Edge	39	26	66.66666667	Netted trees	2	Edge	36	0	0
Open trees	2	Edge	23	18	78.26086957	Netted trees	2	Edge	47	6	12.76595745
Open trees	2	Edge	67	54	80.59701493	Netted trees	2	Edge	20	0	0
Open trees	2	Edge	41	16	39.02439024	Netted trees	2	Edge	14	1	7.142857143
Open trees	2	Edge	32	6	18.75	Netted trees	2	Edge	32	1	3.125
Open trees	2	Edge	28	12	42.85714286	Netted trees	2	Edge	12	4	33.33333333
Open trees	2	Edge	22	11	50	Netted trees	2	Edge	43	4	9.302325581
Open trees	2	Edge	21	15	71.42857143	Netted trees	2	Edge	17	1	5.882352941
Open trees	2	Edge	25	16	64	Netted trees	2	Edge	31	0	0
Open trees	2	Edge	21	16	76.19047619	Netted trees	2	Edge	28	2	7.142857143
Open trees	2	Interior	24	2	8.333333333	Netted trees	2	Interior	14	0	0
Open trees	2	Interior	13	1	7.692307692	Netted trees	2	Interior	32	0	0
Open trees	2	Interior	18	0	0	Netted trees	2	Interior	19	0	0
Open trees	2	Interior	17	1	5.882352941	Netted trees	2	Interior	17	0	0
Open trees	2	Interior	21	1	4.761904762	Netted trees	2	Interior	17	2	11.76470588
Open trees	2	Interior	88	73	82.95454545	Netted trees	2	Interior	23	2	8.695652174
Open trees	2	Interior	30	2	6.666666667	Netted trees	2	Interior	31	3	9.677419355
Open trees	2	Interior	25	2	8	Netted trees	2	Interior	31	0	0
Open trees	2	Interior	14	0	0	Netted trees	2	Interior	37	2	5.405405405
Open trees	2	Interior	30	3	10	Netted trees	2	Interior	34	2	5.882352941
Open trees	2	Interior	39	2	5.128205128	Netted trees	2	Interior	15	2	13.33333333
Open trees	2	Interior	19	2	10.52631579	Netted trees	2	Interior	38	5	13.15789474
Open trees	2	Interior	36	2	5.555555556	Netted trees	2	Interior	33	2	6.060606061
Open trees	2	Interior	26	2	7.692307692	Netted trees	2	Interior	26	0	0
Open trees	2	Interior	42	4	9.523809524	Netted trees	2	Interior	19	0	0
